# Supplementary material for: Bio-inspired hierarchical nanoporous carbon derived from water spinach for high-performance supercapacitor electrode materials
Source: Royal Society of Chemistry journal article supplement (doi:10.1039/d1na00636c), 2022-01-01
Supplement: d1na00636c1.pdf [file d1na00636c1.pdf]

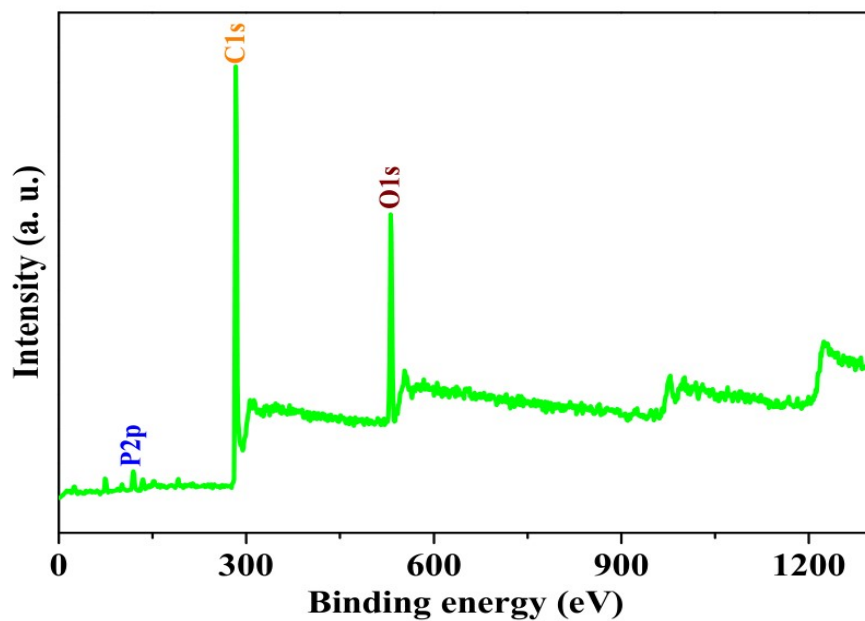

Figure S1 XPS survey spectrum of WSAC-3

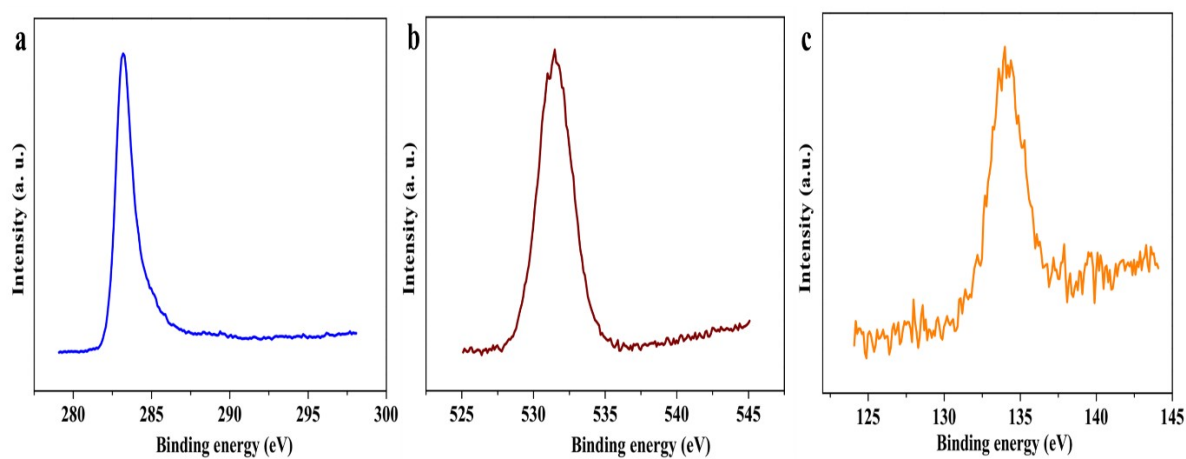

Figure S2 (a) C1s scan of WSAC-3; (b) O1s scan of WSAC-3; (c) P2p scan of WSAC-3

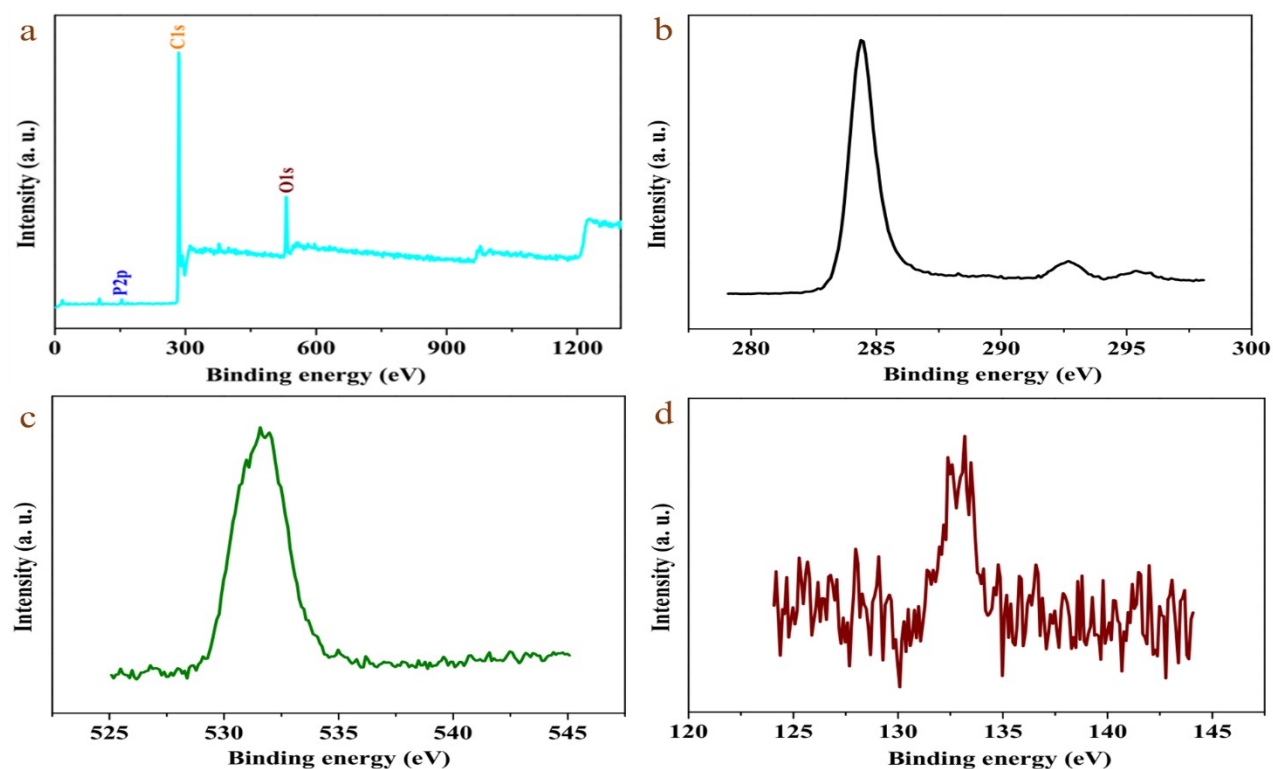

Figure S3 (a) XPS survey spectrum of WSC; (b) C1s scan of WSC; (c) O1s scan of WSC; (d) P2p scan of WSC

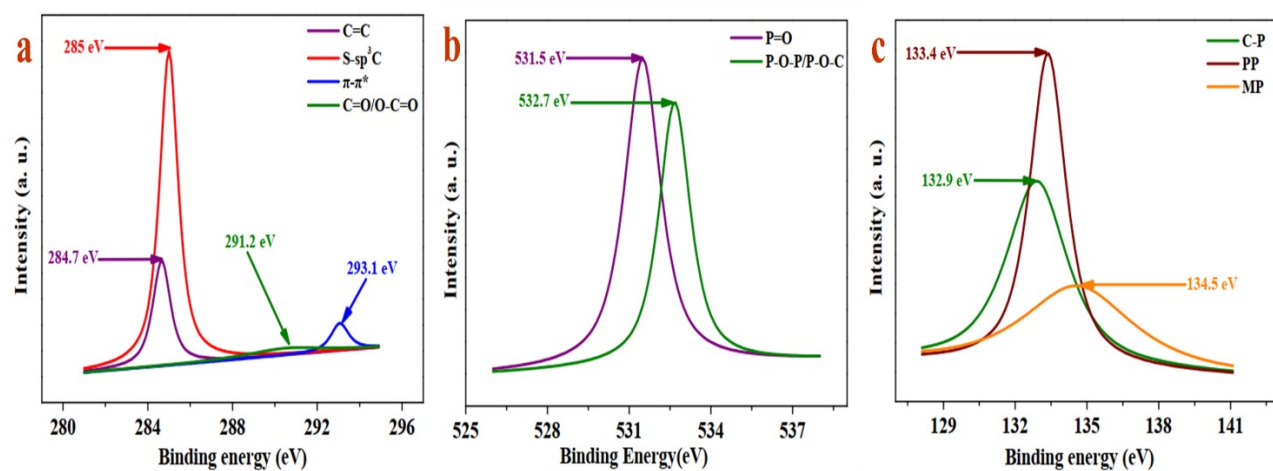

Figure S4 (a) High resolution C1s of WSC; (b) High resolution O1s of WSC; (c) High resolution P2p of WSC

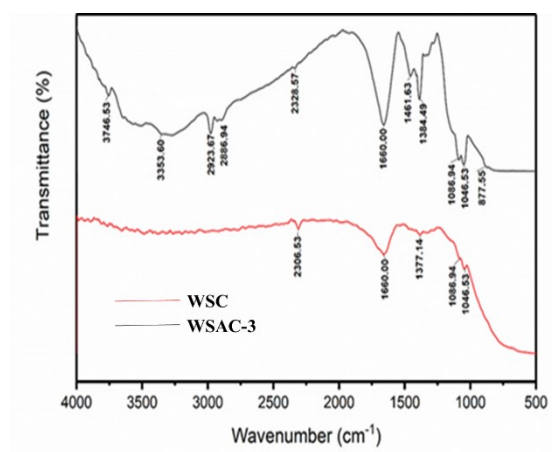

Figure S5 FT-IR spectra of WSC and WSAC-3 materials

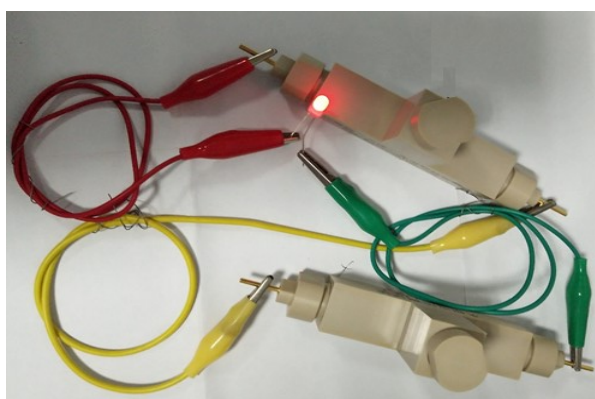

Figure S6 photograph of lighting LED bulbs
